# Supplementary material
Source: Springer Nature journal article supplement (https://www.springermedizin.de/resource/supplementary/13256_2010_1444_MOESM3_ESM.pdf/9648886)

RT. KIDNEY

88/89  
49Hz

R16 G59 C3



Supplement: MOESM3 [file 9648886]
